# Supplementary material for: Competitive α-glucosidase inhibitors, dihydrobenzoxanthones, from the barks of Artocarpus elasticus
Source: PubMed Central journal article supplement (PMC6735331; doi:10.1080/14756366.2019.1660653), 2019-09-03
Supplement: IENZ_A_1660653_SM1667.pdf [file IENZ_A_1660653_SM1667.pdf]

## Supplementary information

### <sup>13</sup>C NMR spectroscopic data of compounds:

**Artobiloxanthone (2)** <sup>13</sup>C NMR (125 MHz, acetone-*d*<sub>6</sub>) δ 21.99 (C-12), 22.27 (C-9), 28.20 (C-18), 28.54 (C-17), 38.14 (C-10), 78.71 (C-16), 99.78 (C-6), 102.03 (C-8), 103.7 (C-3'), 105.51 (C-4a), 107.03 (C-1'), 111.43 (C-3), 111.91 (C-13), 116.14 (C-14), 127.88 (C-6'), 129.88 (C-15), 136.68 (C-5'), 145.35 (C-4'), 150.92 (C-11), 151.57 (C-2'), 152.31 (C-8a), 159.48 (C-7), 161.80 (C-5), 162.57 (C-2), 181.27 (C=O, C-4).

**Artoindonesianin P (3)** <sup>13</sup>C NMR (125 MHz, acetone-*d*<sub>6</sub>) δ 21.18 (C-9), 23.07 (C-12), 28.54 (C-13), 50.05 (C-10), 94.44 (C-11), 95.23 (C-8), 100.11 (C-6), 105.22 (C-1'), 105.27 (C-4a), 103.73 (C-3'), 112.96 (C-3), 133.92 (C-6'), 138.35 (C-5'), 147.88 (C-4'), 152.16 (C-2'), 158.57 (C-8a), 162.63 (C-5), 163.16 (C-2), 165.39 (C-7), 181.98 (C=O, C-4).

**Cycloartobiloxanthone (4)** <sup>13</sup>C NMR (125 MHz, acetone-*d*<sub>6</sub>) δ 20.61 (C-9), 23.10 (C-13), 28.51 (C-18), 28.53 (C-17), 28.71 (C-12), 47.78 (C-10), 78.99 (C-16), 93.97 (C-11), 100.19 (C-6), 102.14 (C-8), 105.13 (C-4a), 105.64 (C-1'), 105.64 (C-3'), 112.95 (C-3), 116.21 (C-14), 128.16 (C-15), 133.96 (C-6'), 138.17 (C-5'), 147.30 (C-4'), 151.84 (C-2'), 152.31 (C-8a), 159.77 (C-5), 161.78 (C-2), 162.88 (C-7), 181.69 (C=O, C-4).

**Artonin E (6)** <sup>13</sup>C NMR (125 MHz, acetone-*d*<sub>6</sub>) δ 18.02 (C-13), 25.03 (C-9), 26.19 (C-12), 28.62 (C-17 and C-18), 79.12 (C-16), 100.06 (C-6), 101.94 (C-8), 105.07 (C-3'), 105.94 (C-4a), 111.76 (C-1'), 115.79 (C-14), 117.40 (C-6'), 121.99 (C-3), 122.84 (C-10), 128.36 (C-15), 132.67 (C-11), 139.45 (C-5'), 149.83 (C-4'), 150.13 (C-2'), 153.61 (C-8a), 160.29 (C-7), 162.59 (C-5), 163.09 (C-2), 183.63 (C=O, C-4).

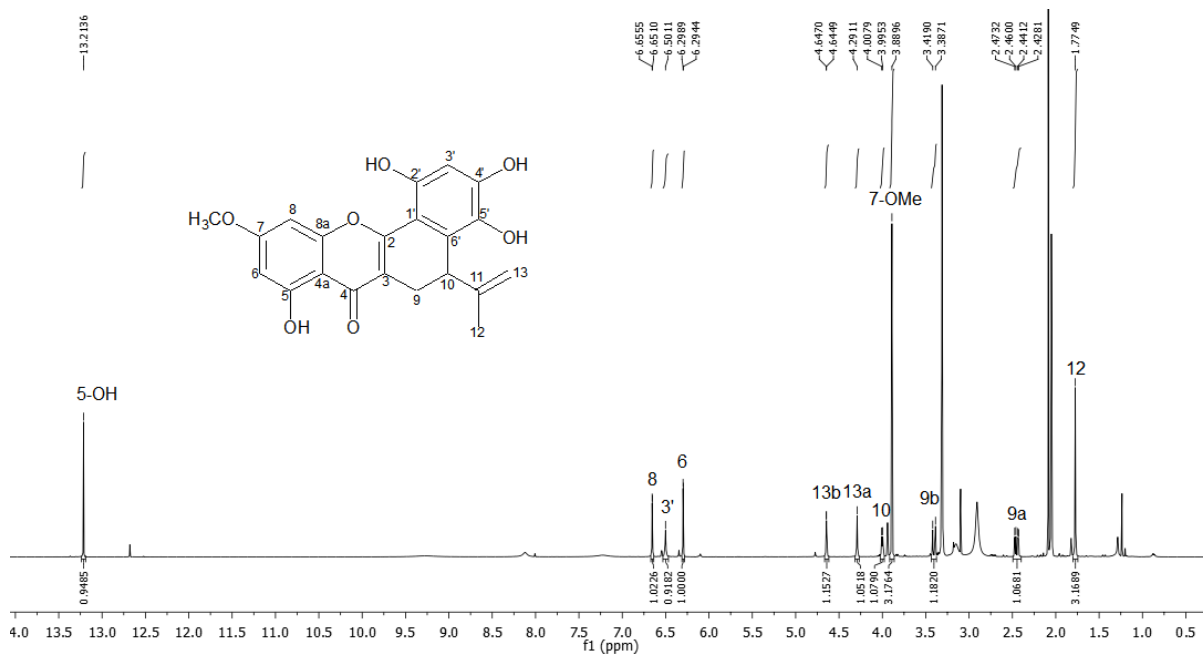

Figure S1. <sup>1</sup>H-NMR spectrum of compound 1 (500MHz, acetone-*d*<sub>6</sub>)

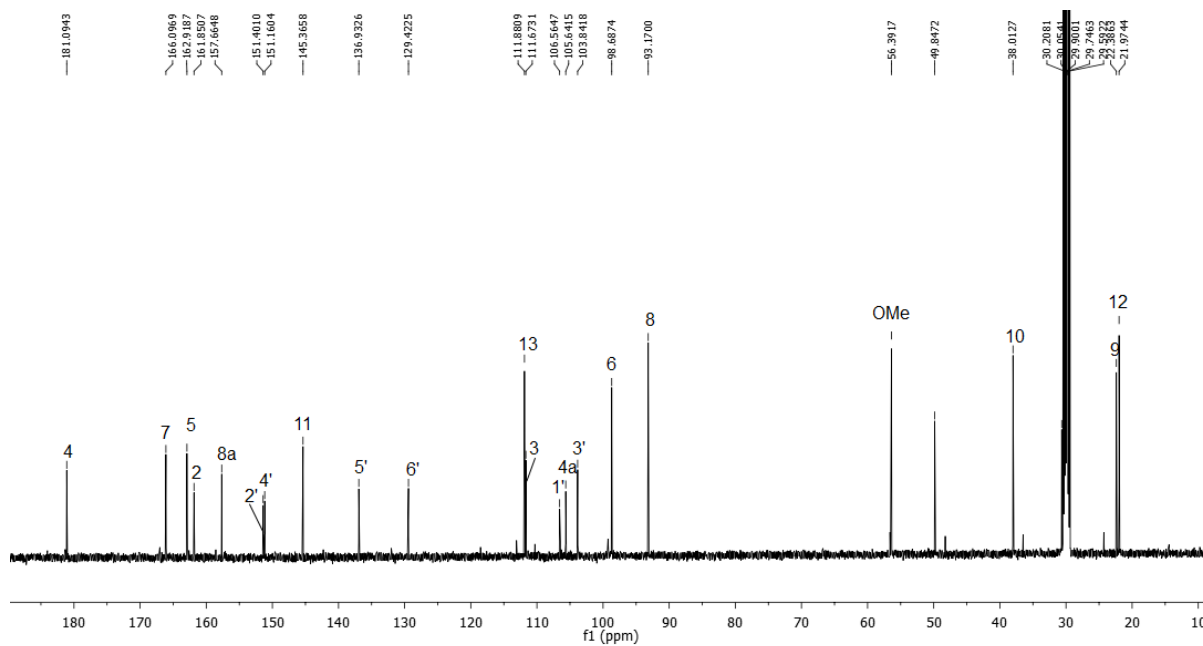

Figure S2. <sup>13</sup>C-NMR spectrum of compound 1 (125MHz, acetone-*d*<sub>6</sub>)

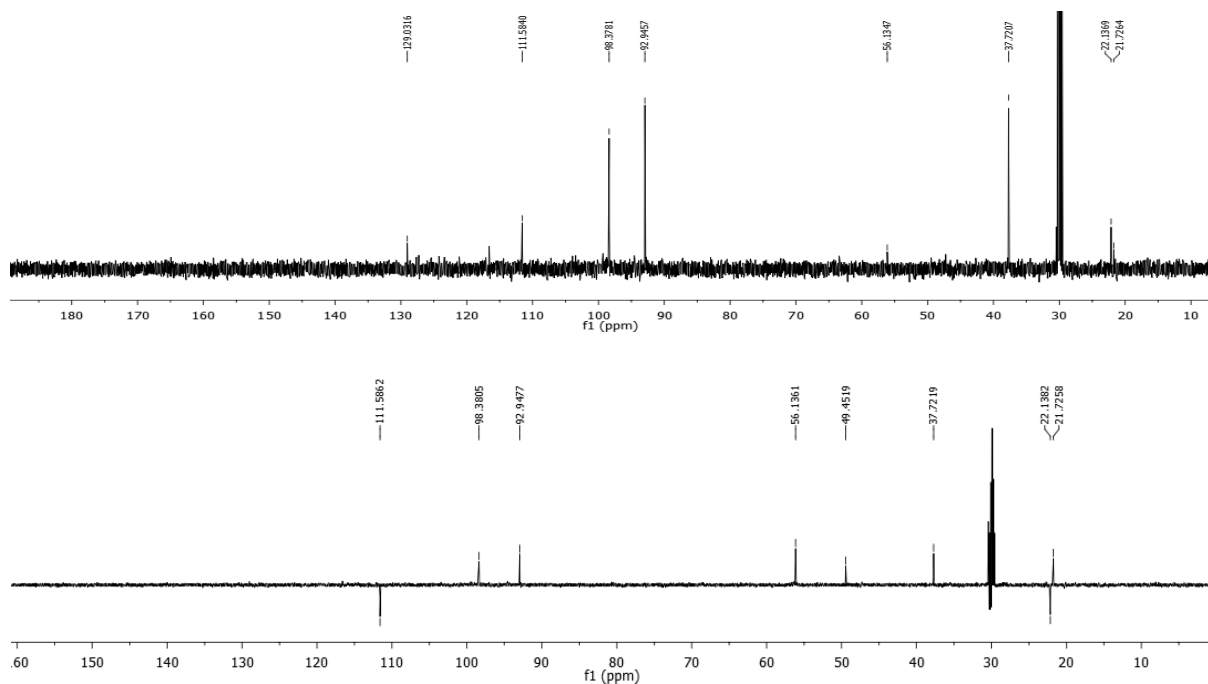

**Figure S3.** DEPT-90 and -135 spectrum of compound **1**.

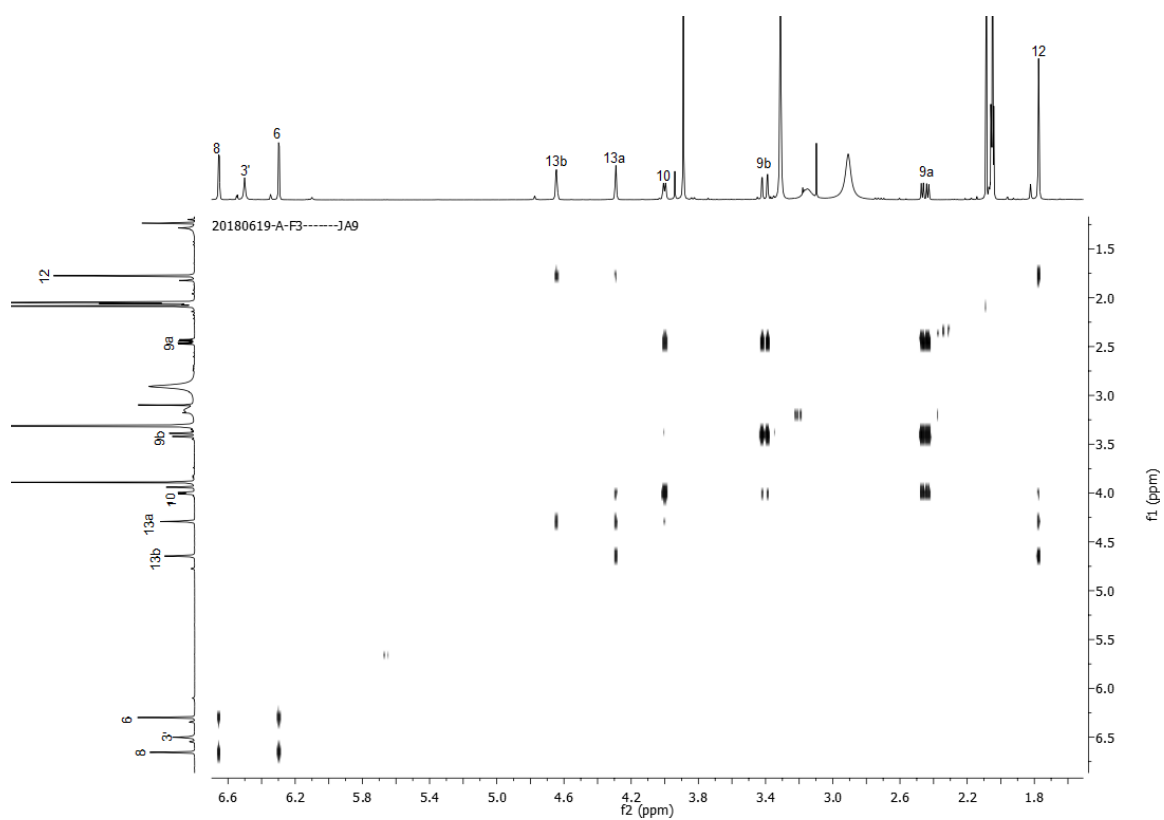

**Figure S4.** COSY spectrum of compound **1**.

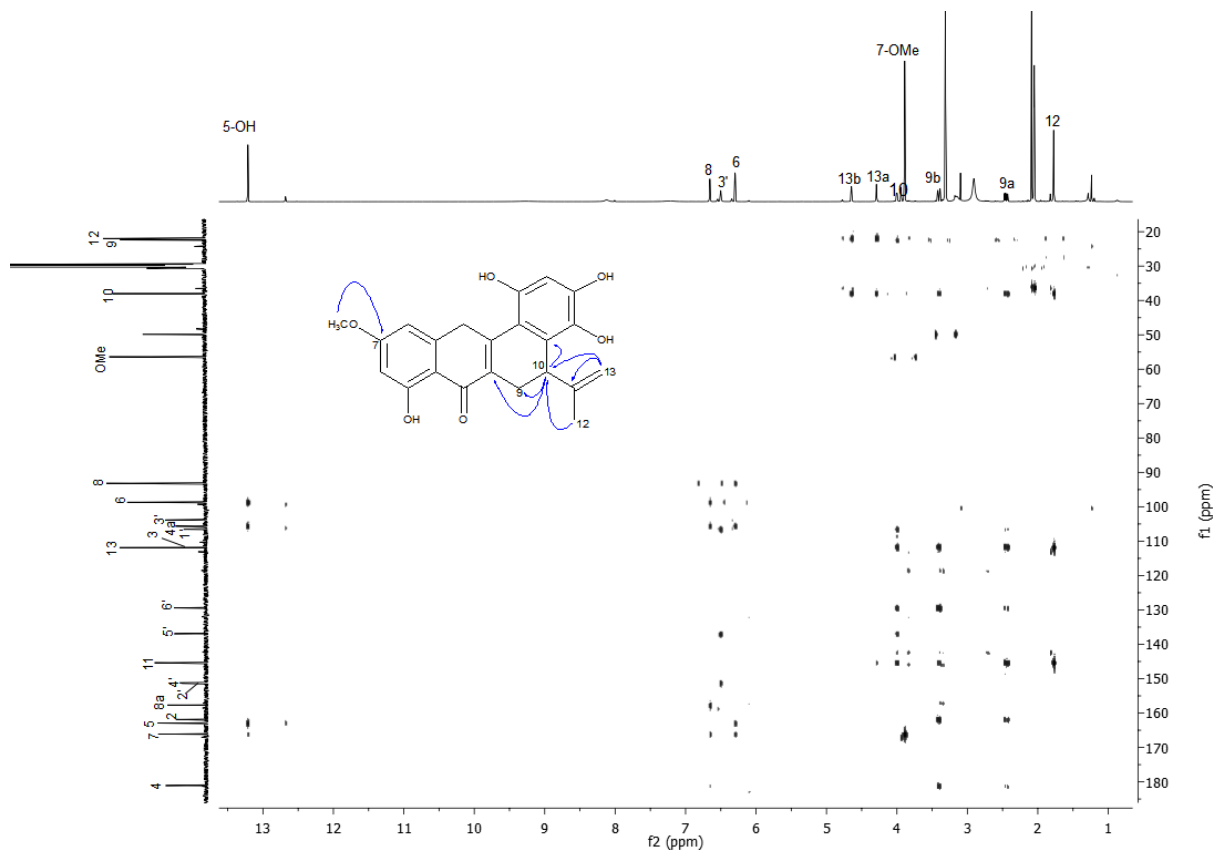

Figure S5. HMBC spectrum of compound 1.

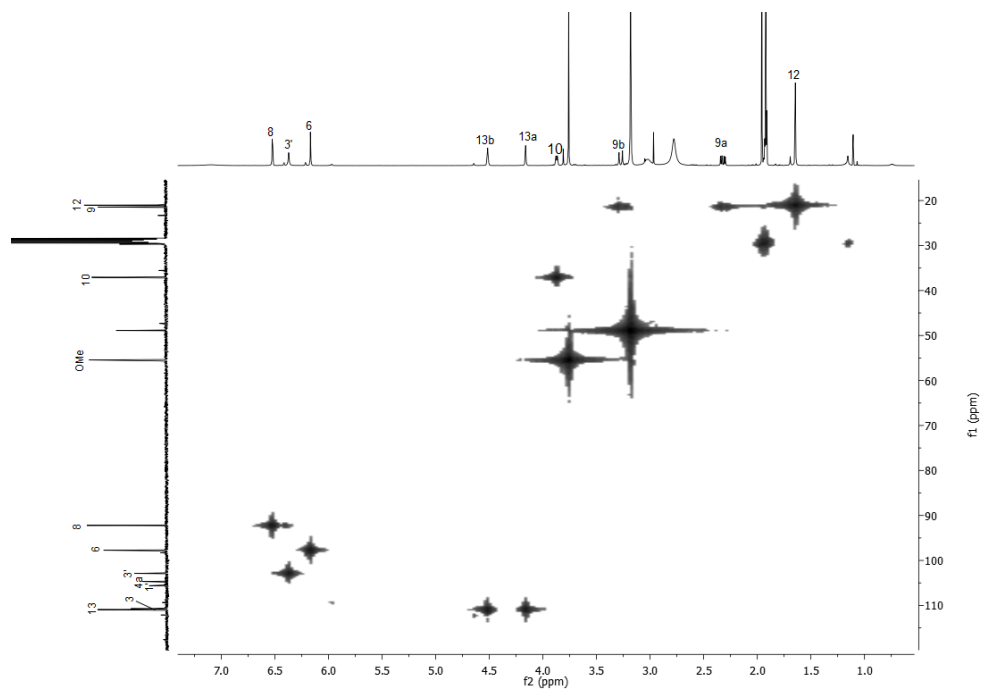

Figure S6. HMQC spectrum of compound 1.

[ Mass Spectrum ]  
 Date : F3-1 Date : 21-Dec-2018 16:54  
 Sample : -  
 Note : -  
 Inlet : Direct Ion Mode : FAB+  
 Spectrum Type : Normal Ion [MF-Linear]  
 RT : 0.45 min Scan# : 4  
 BP : m/z 154.0629 Int. : 237.67  
 Output m/z range : 100.0000 to 1002.0772 Cut Level : 0.00 %  
 2638742

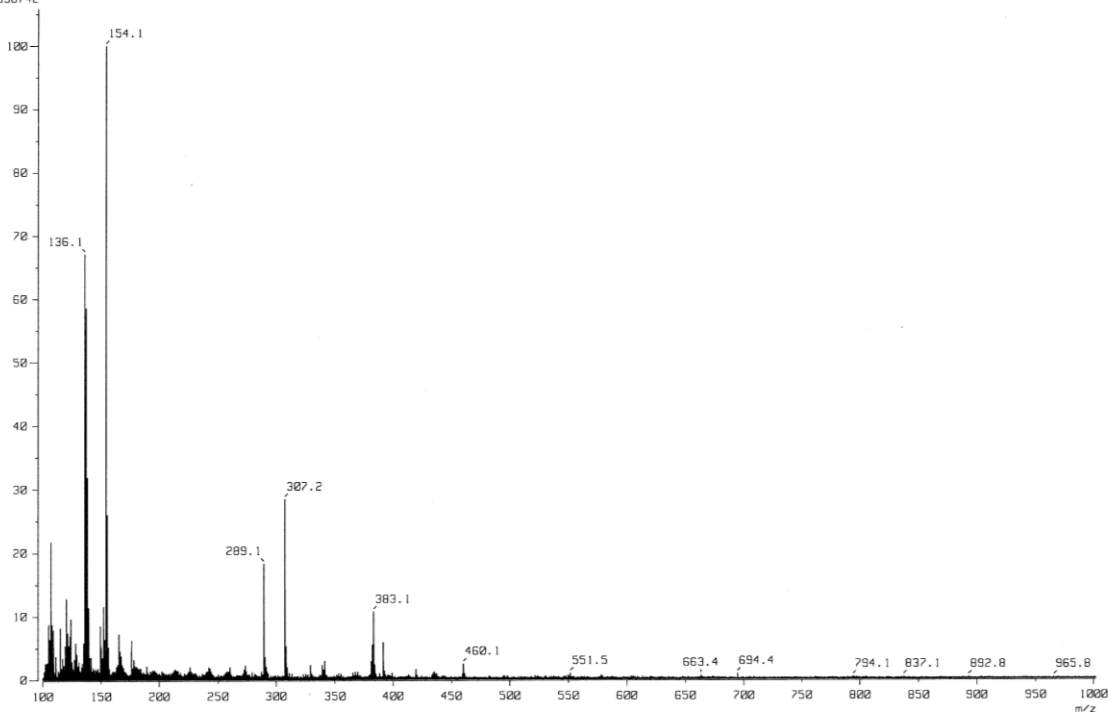

[ Elemental Composition ]

Pag

Data : A-F3\_HR Date : 10-Jan-2019 16:29  
 Sample : -  
 Note : -  
 Inlet : Direct Ion Mode : FAB+  
 RT : 4.67 min Scan# : 57  
 Elements : C 110/1, H 130/1, O 8/1  
 Mass Tolerance : 100ppm, 3mmu if m/z > 30  
 Unsaturation (U.S.) : 0.0 - 30.0

| Observed m/z | Int%  | Err [ppm / mmu] | U.S. Composition   |
|--------------|-------|-----------------|--------------------|
| 383.1149     | 100.0 | +4.8 / +1.9     | 12.5 C 21 H 19 O 7 |

Figure S7. FABMS and HRFABMS data of compound 1.

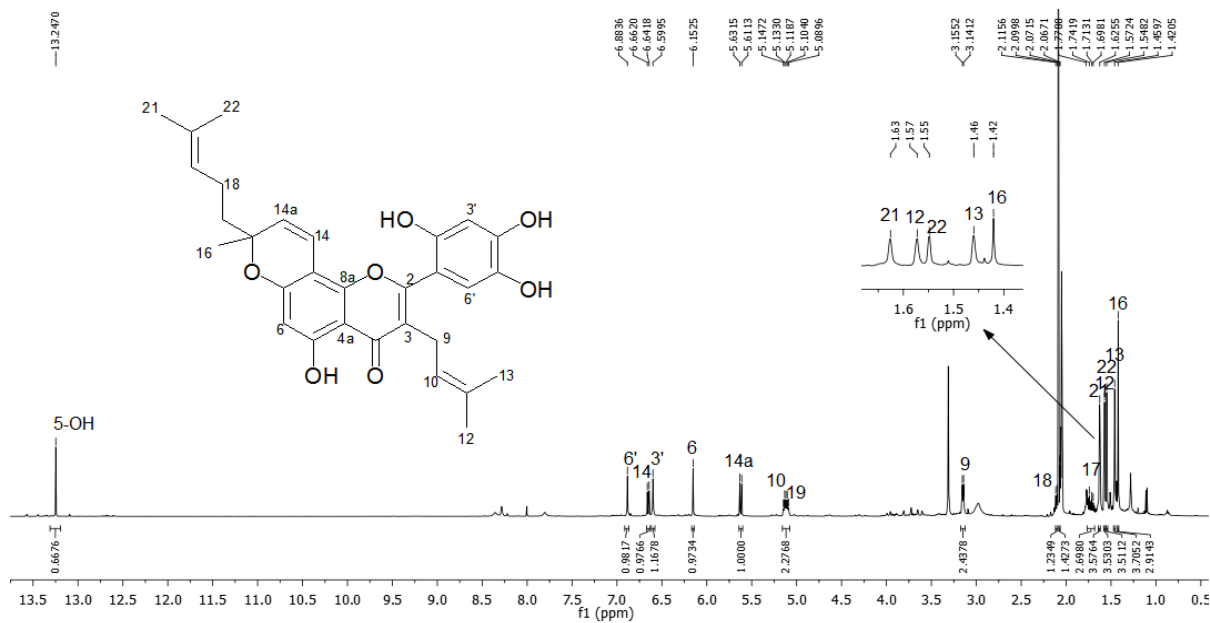

**Figure S8.**  $^1\text{H-NMR}$  spectrum of compound **5** (500MHz, acetone- $d_6$ )

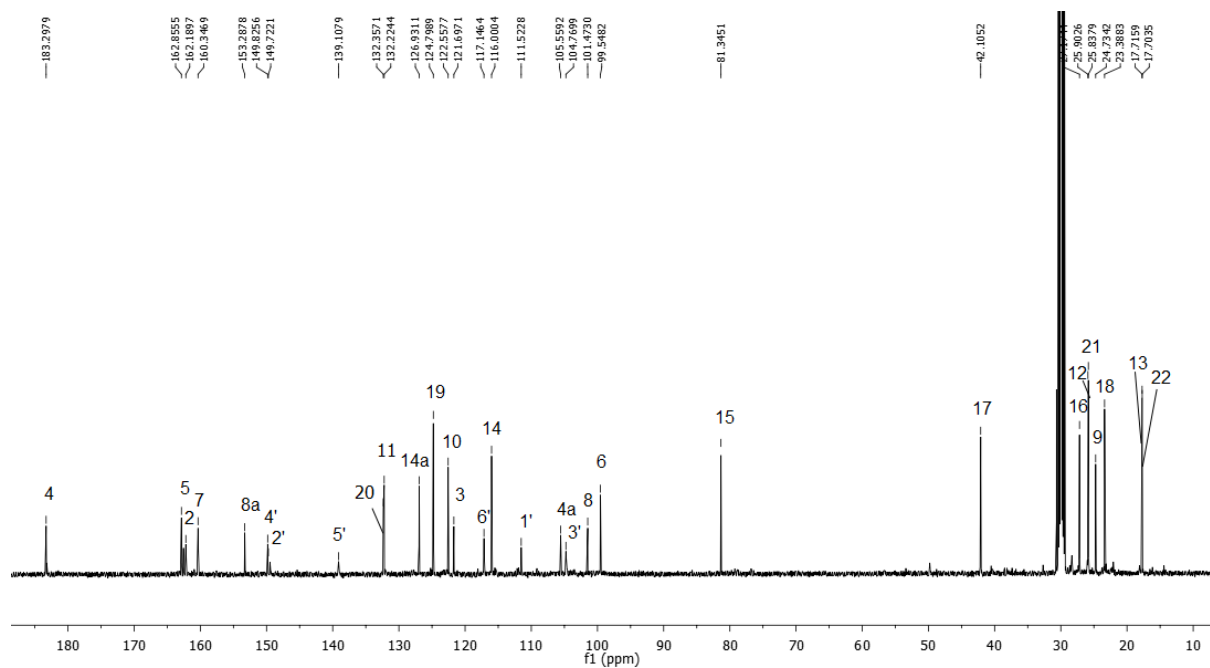

**Figure S9.**  $^{13}\text{C-NMR}$  spectrum of compound **5** (125MHz, acetone- $d_6$ )

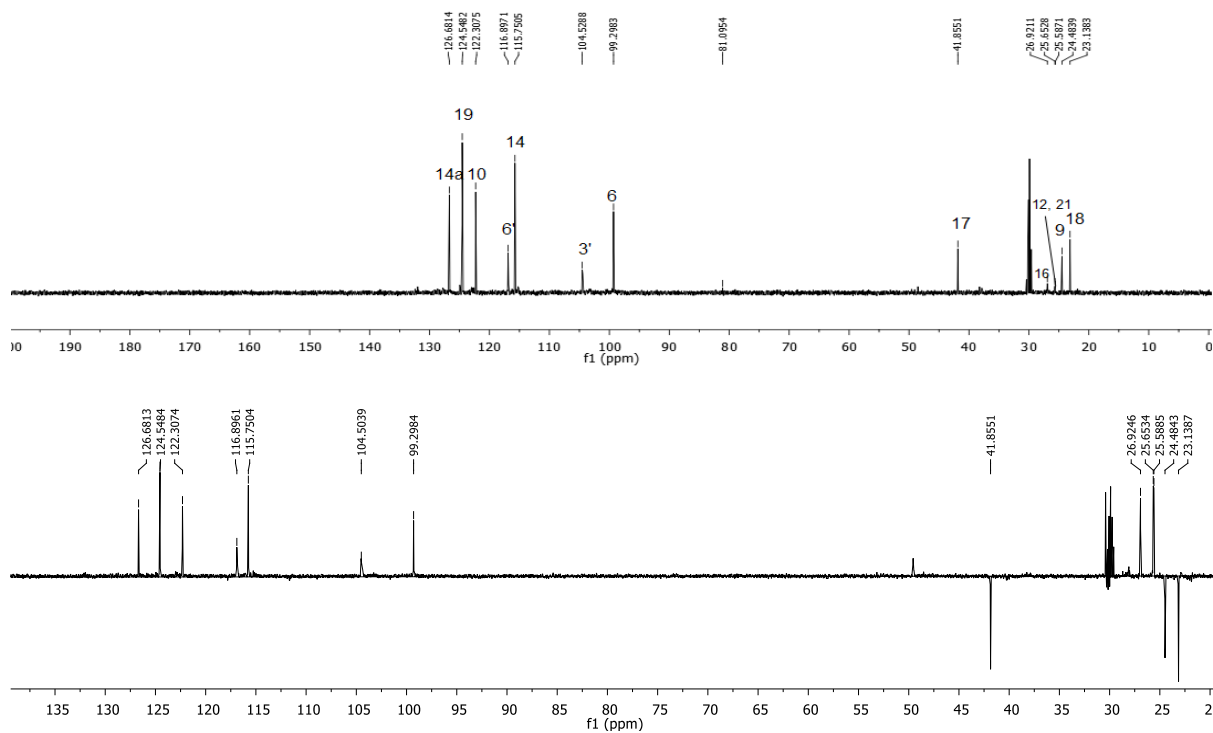

Figure S10. DEPT135 spectrum of compound 5.

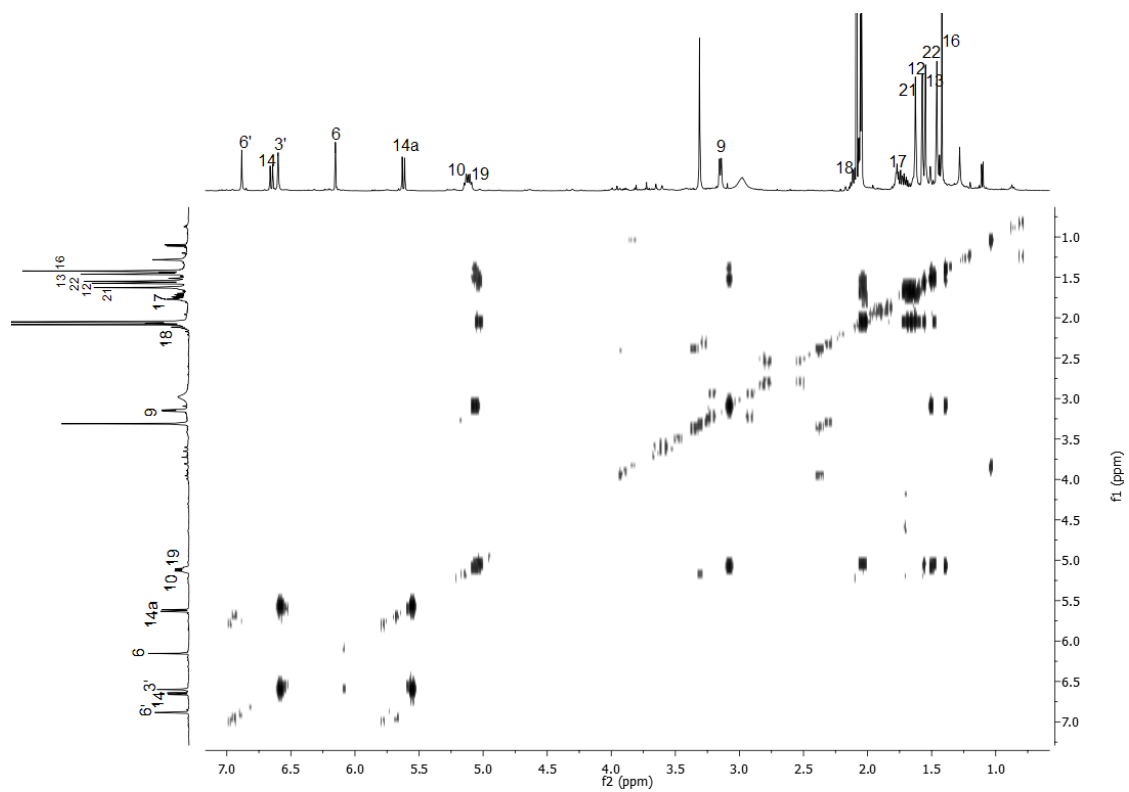

Figure S11. COSY spectrum of compound 5.

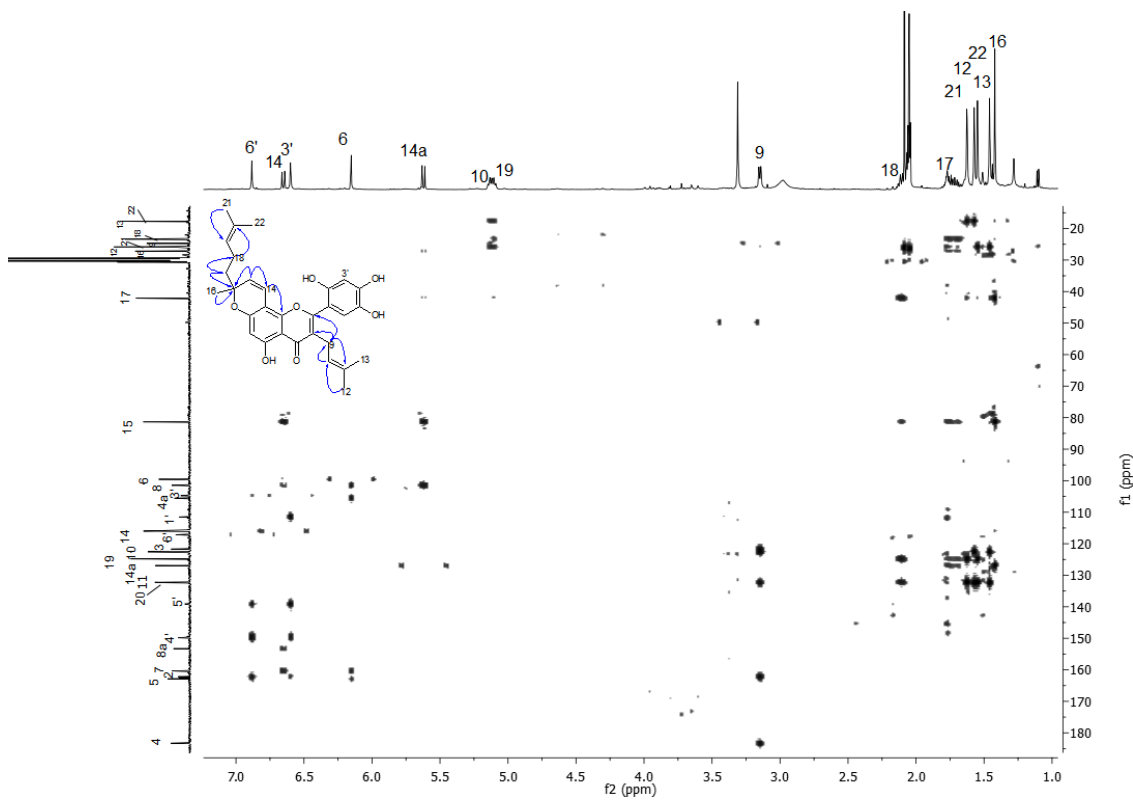

Figure S12. HMBC spectrum of compound 5.

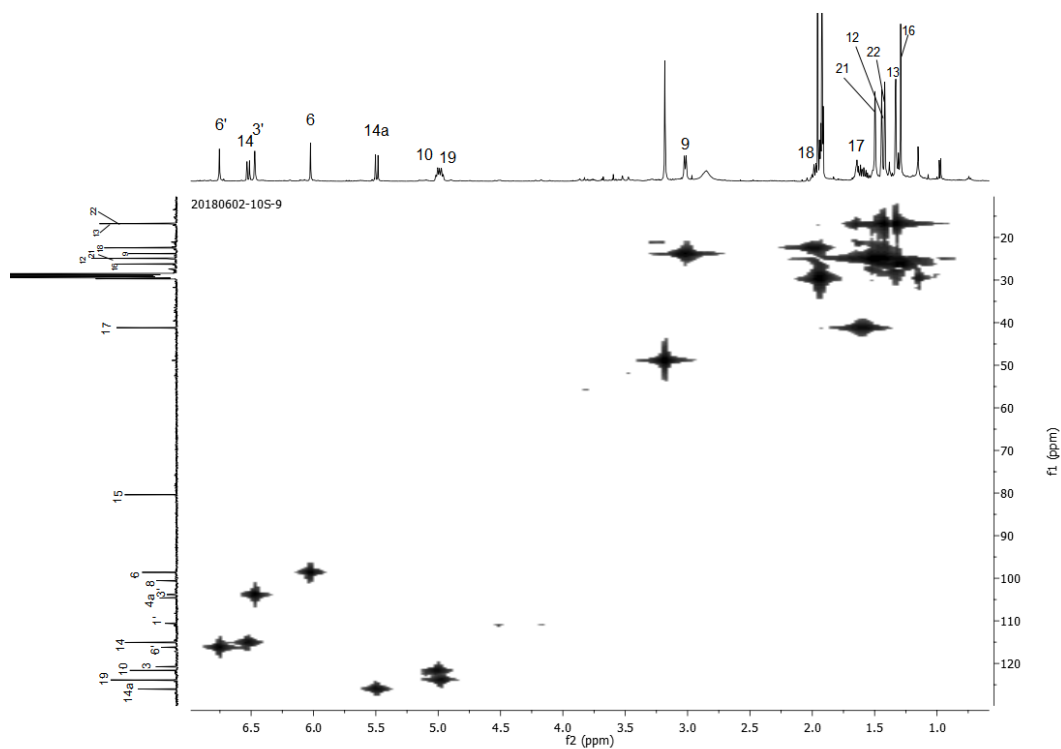

Figure S13. HMQC spectrum of compound 5.



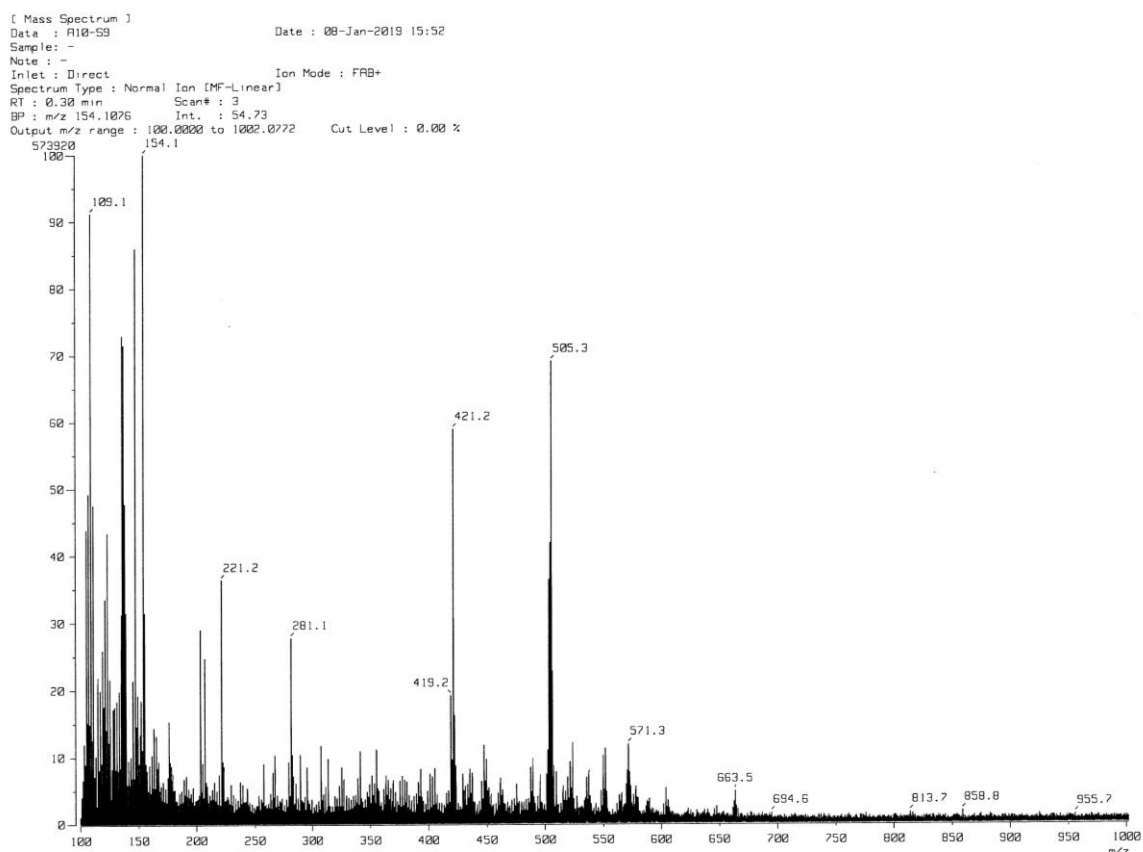

[ Elemental Composition ]  
 Data : A10-S9\_HR Date : 08-Jan-2019 17:31  
 Sample : -  
 Note : -  
 Inlet : Direct Ion Mode : FAB+  
 RT : 4.84 min Scan# : 59  
 Elements : C 110/1, H 130/1, O 8/1  
 Mass Tolerance : 100ppm, 3mmu if m/z > 30  
 Unsaturation (U.S.) : 0.0 - 30.0

| Observed m/z | Int% | Err [ppm / mmu] | U.S. | Composition   |
|--------------|------|-----------------|------|---------------|
| 505.2216     | 34.6 | -1.9 / -1.0     | 14.5 | C 30 H 33 O 7 |

Figure S14. FABMS and HRFABMS data of compound 5.

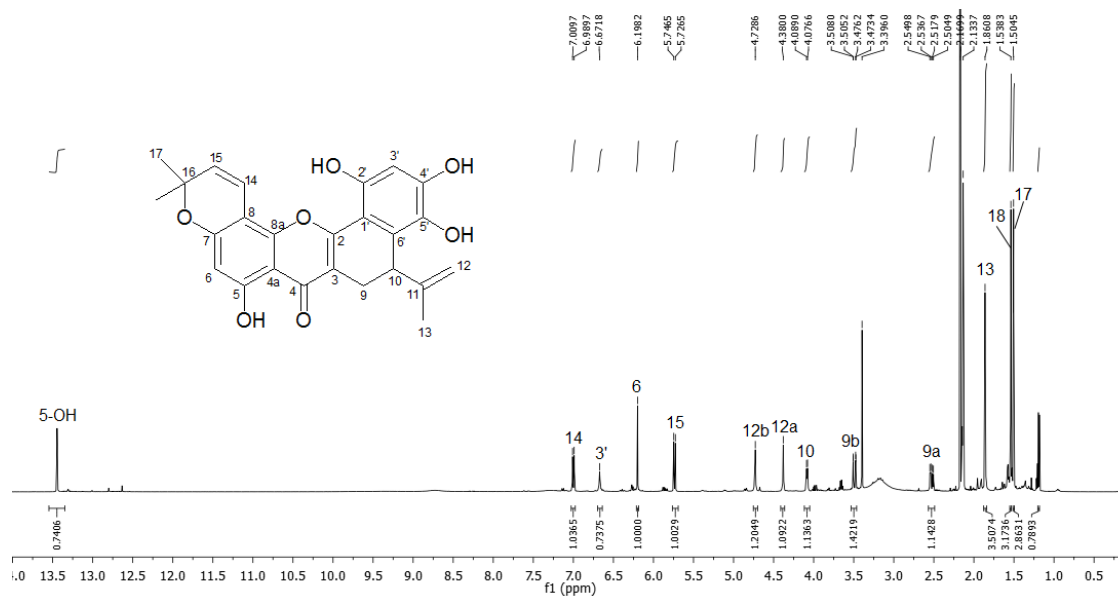

Figure S15.  $^1\text{H-NMR}$  spectrum of compound **2** (500MHz, acetone- $d_6$ )

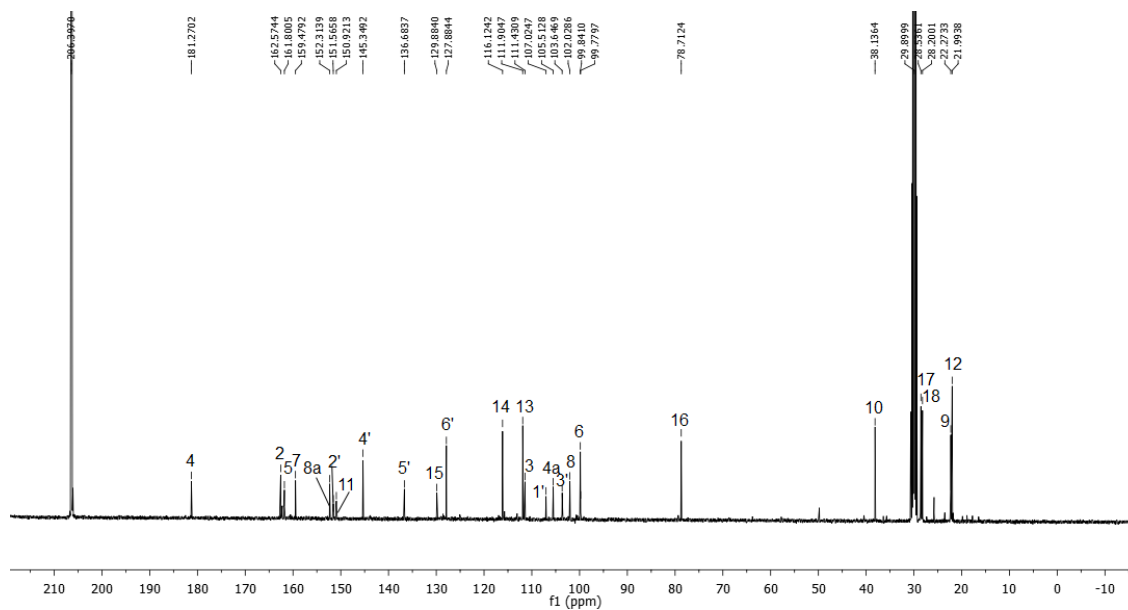

Figure S16.  $^{13}\text{C-NMR}$  spectrum of compound **2** (125MHz, acetone- $d_6$ )

Data: A-F2\_HR Date: 19-Jun-2018 14:03  
 Instrument: MStation  
 Sample: -  
 Note: -  
 Inlet: Direct Ion Mode: EI+  
 RT: 1.80 min Scan#: 28  
 Elements: C 100/1, H 100/1, O 10/1  
 Mass Tolerance : 1000ppm, 3mmu if m/z > 3  
 Unsaturation (U.S.): -0.5 - 20.0

| Observed m/z | Int%  | Err [ppm / mmu] | U.S. Composition |
|--------------|-------|-----------------|------------------|
| 1 434.1363   | 21.31 | -0.6 / -0.3     | 15.0 C25 H22 O7  |

Figure S17. HR-ESI-MS data of compound **2**.

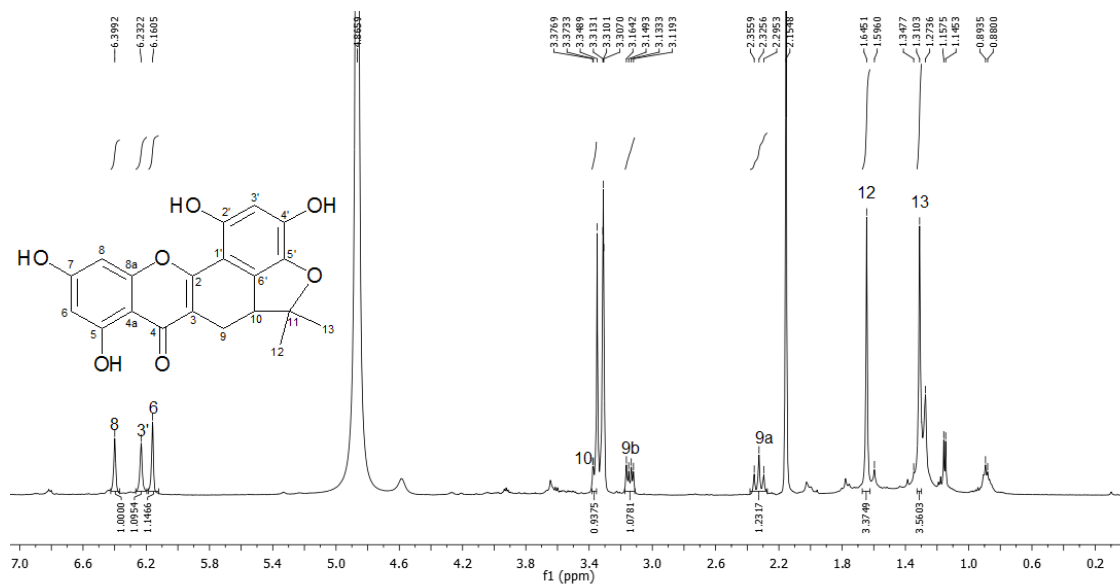

Figure S18.  $^1\text{H-NMR}$  spectrum of compound **3** (500MHz, acetone- $d_6$ )

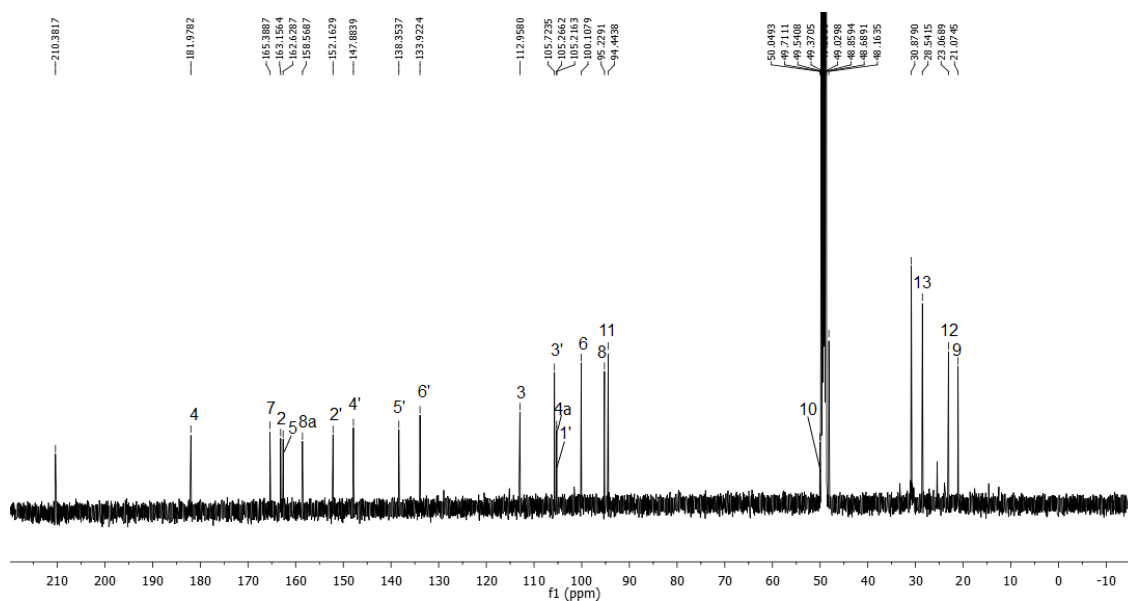

Figure S19.  $^{13}\text{C-NMR}$  spectrum of compound **3** (125MHz, acetone- $d_6$ )

Data : F3-4\_HR Date : 19-Jun-2018 15:31  
 Instrument : MStation  
 Sample : -  
 Note : -  
 Inlet : Direct Ion Mode : EI+  
 RT : 1.94 min Scan# : 30  
 Elements : C 100/1, H 100/1, O 10/1  
 Mass Tolerance : 1000ppm, 3mmu if m/z > 3  
 Unsaturation (U.S.) : -0.5 - 20.0

|   | Observed m/z | Int%  | Err [ppm / mmu] | U.S. Composition |
|---|--------------|-------|-----------------|------------------|
| 1 | 368.0899     | 21.53 | +0.8 / +0.3     | 13.0 C20 H16 O7  |

Figure S20. HR-ESI-MS data of compound **3**.

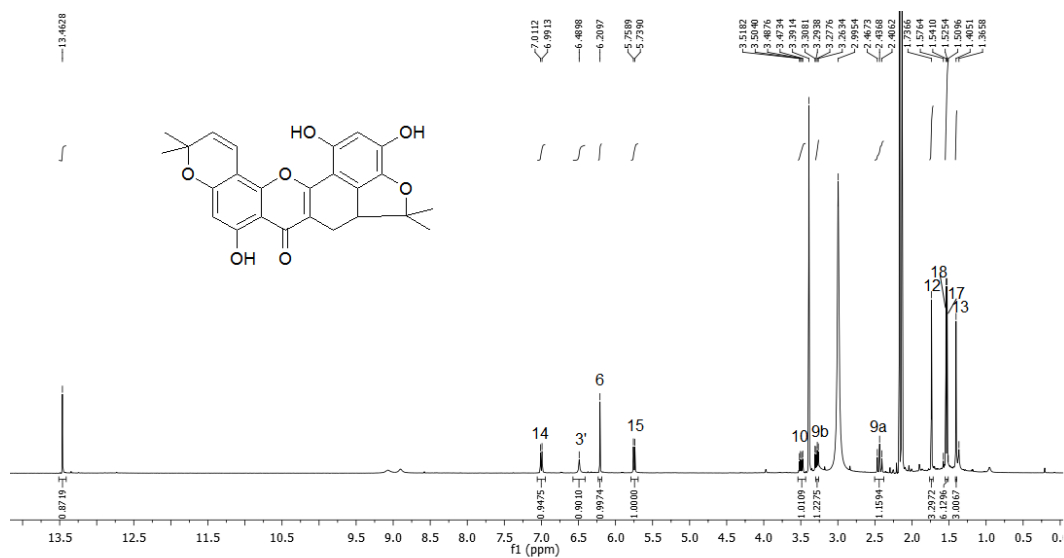

Figure S21. <sup>1</sup>H-NMR spectrum of compound 4 (500MHz, acetone-*d*<sub>6</sub>)

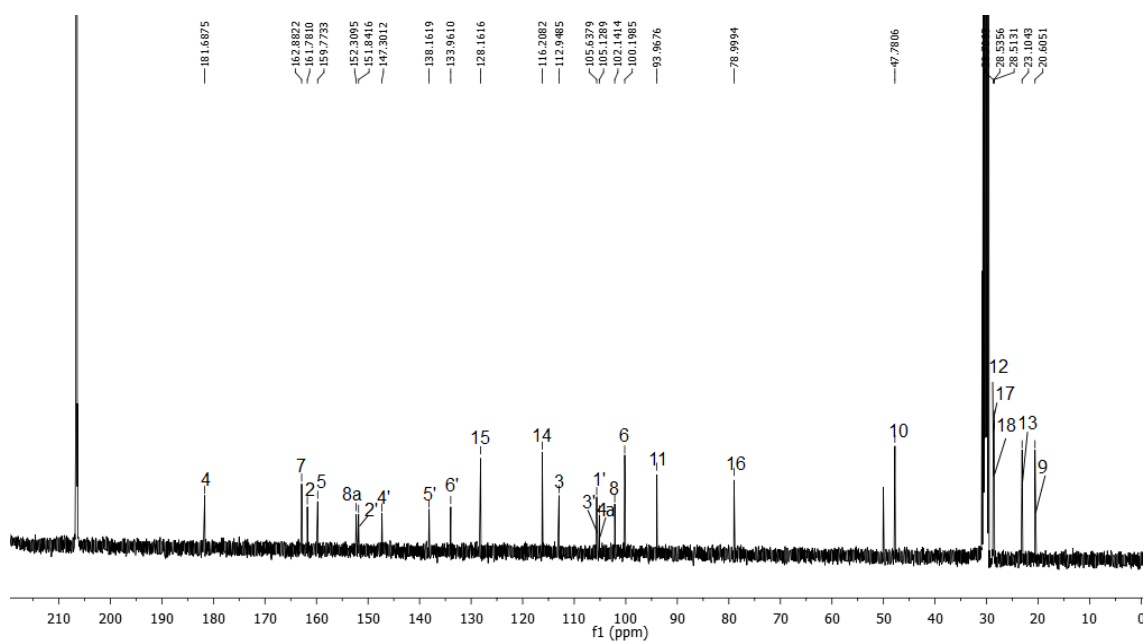

Figure S22. <sup>13</sup>C-NMR spectrum of compound 4 (125MHz, acetone-*d*<sub>6</sub>)

Data: F11\_HR Date: 19-Jun-2018 14:15  
 Instrument: MStation  
 Sample: -  
 Note: -  
 Inlet: Direct Ion Mode: EI+  
 RT: 3.14 min Scan#: 48  
 Elements: C 100/1, H 100/1, O 10/1  
 Mass Tolerance: 1000ppm, 3mmu if m/z > 3  
 Unsaturation (U.S.): -0.5 - 20.0

| Observed m/z | Int%  | Err[ppm / mmu] | U.S. Composition |
|--------------|-------|----------------|------------------|
| 1 434.1364   | 22.03 | -0.4 / -0.2    | 15.0 C25 H22 O7  |

Figure S23. HR-ESI-MS data of compound 4.

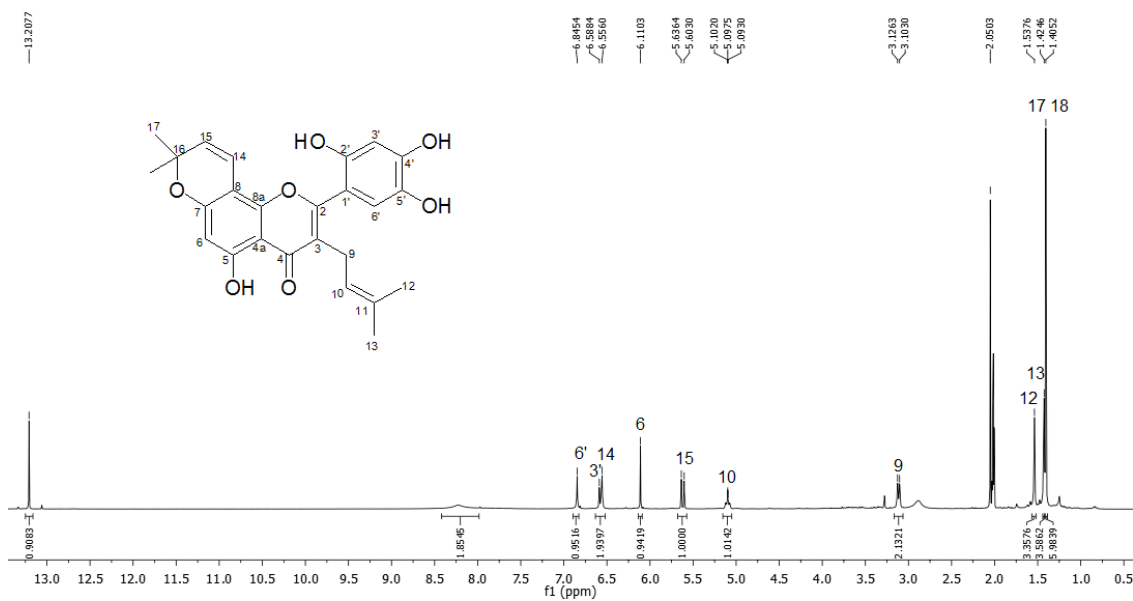

Figure S24.  $^1\text{H}$ -NMR spectrum of compound **6** (500MHz, acetone- $d_6$ )

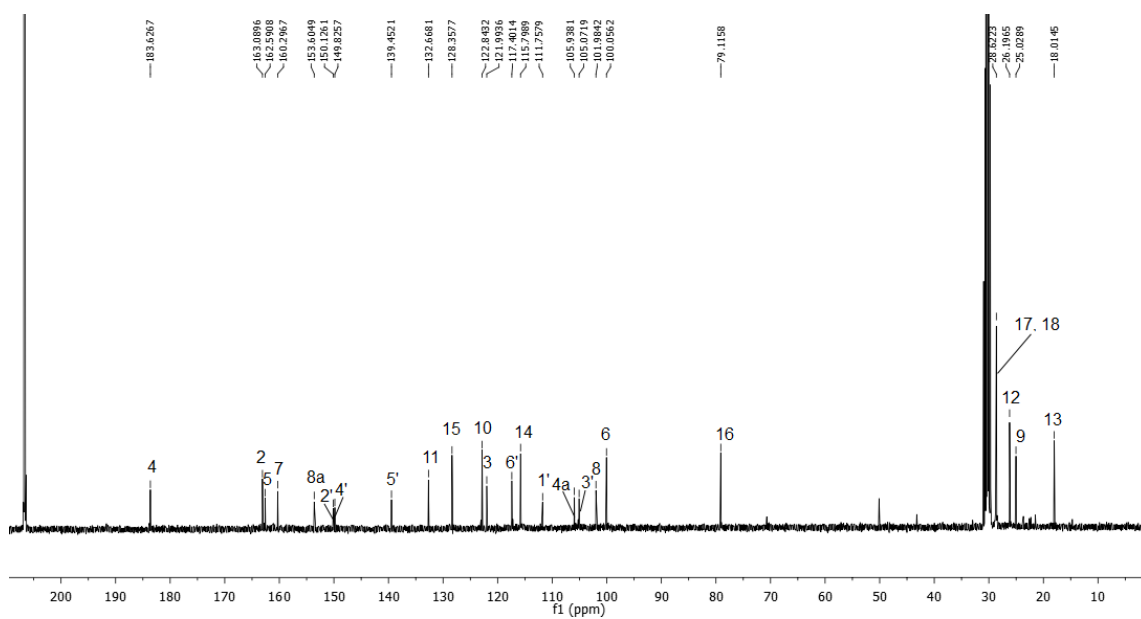

Figure S25.  $^{13}\text{C}$ -NMR spectrum of compound **6** (125MHz, acetone- $d_6$ )

```
[ Elemental Composition ]
Data : A-F8_HR                               Date : 08-Jan-2019 17:22
Sample: -                                     Ion Mode : FAB+
Note : -                                       Scan#: 8
Inlet : Direct
RT : 0.59 min
Elements : C 110/1, H 130/1, O 8/1
Mass Tolerance : 100ppm, 5mmu if m/z > 50
Unsaturation (U.S.) : 0.0 - 30.0

Observed m/z Int% Err [ppm / mmu] U.S. Composition
437.1635 20.4 +7.8 / +3.4 13.5 C 25 H 25 O 7
```

Figure S26. HR-ESI-MS data of compound **6**.

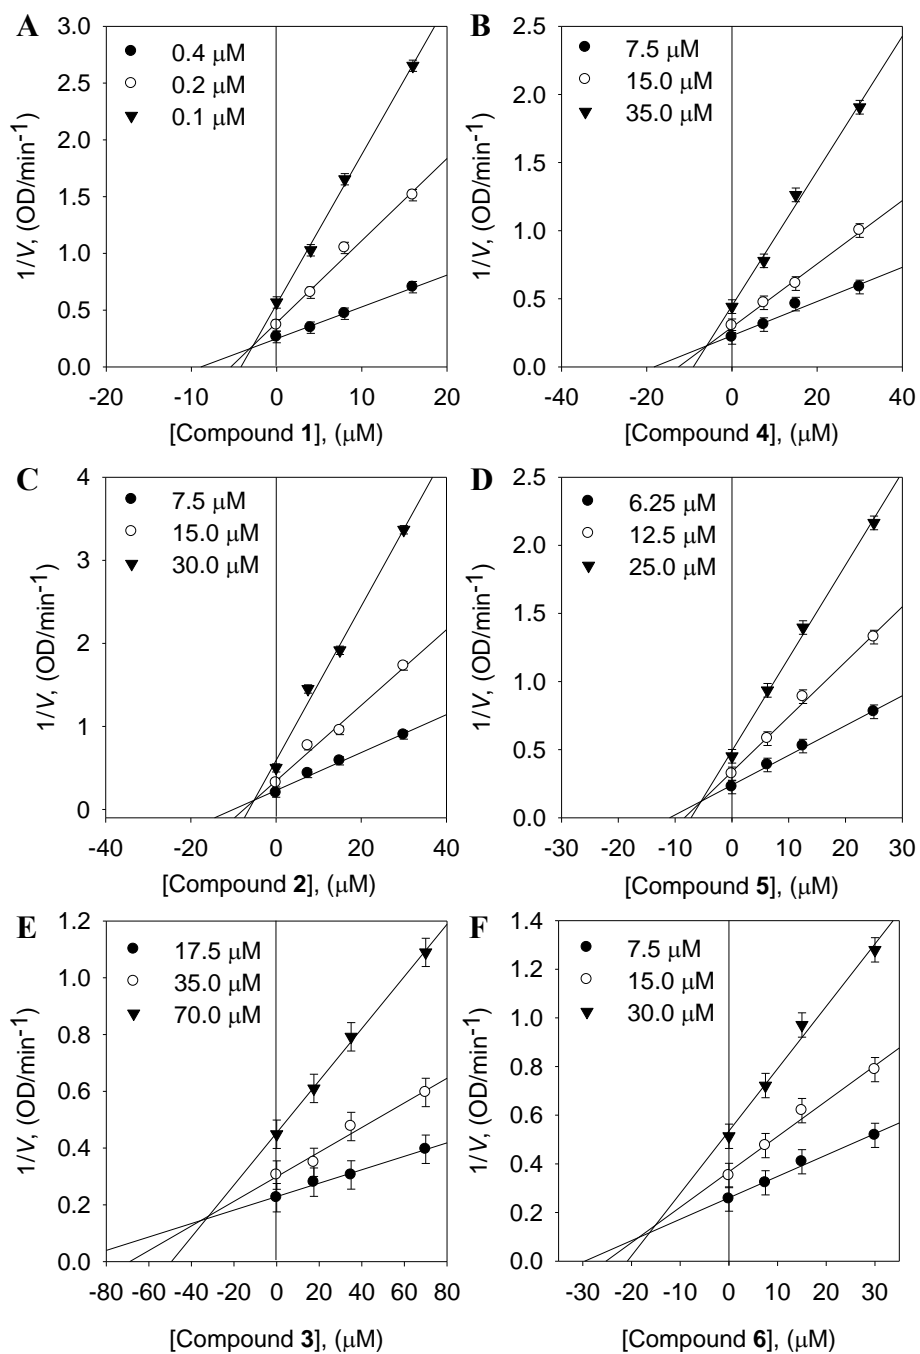

**Figure S27.** Dixon plots for  $\alpha$ -glucosidase of compounds 1-6.

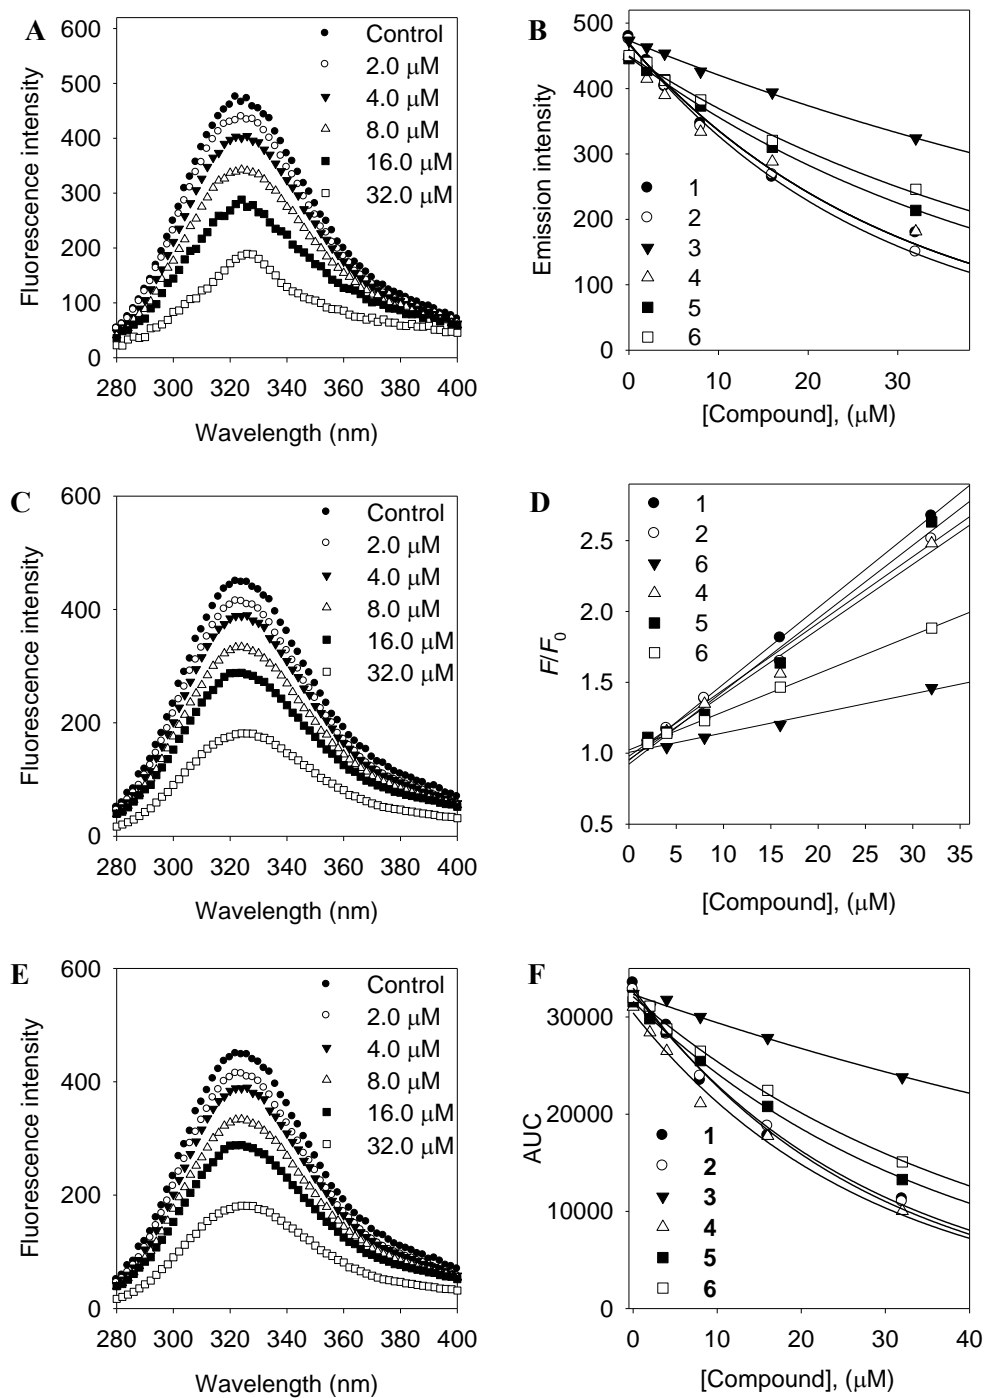

**Figure S28.** (A) The fluorescence effect of compound 2, (C) compound 4 and (E) compound 5 on fluorescence emission spectra of  $\alpha$ -glucosidase, (B) Decrease in intensity of the emission plots of compounds, (D) Stern-Volmer plots of compounds at 37  $^{\circ}$ C, (F) Area under curve (AUC) of compounds.

```

1  MTISDHPETE  PKWWKEATIY  QIYPASFKDS  NNDGWGDLKG  ITSKLQYIKD
51  LGVDAIWVCP  FYDSPQQDMG  YDISNYEKVW  PTYGTNEDCF  ELIDKTHKLG
101 MKFITDLVIN  HCSTEHEWFK  ESRSSKTNPK  RDWFFWRPPK  GYDAEGKPIP
151 PNNWKSFFGG  SAWTFDETTN  EFYLRLFASR  QVDLNWENED  CRRAIFESAV
201 GFWLDHGVDG  FRIDTAGLYS  KRPGLPDSPI  FDKTSKLQHP  NWGSHNGPRI
251 HEYHQELHRF  MKNRVKDGRE  IMTVGEVAHG  SDNALYTSAA  RYEVSEVFSF
301 THVEVGTSPF  FRYNIVPFTL  KQWKEAIASN  FLFINGTDSW  ATTYIENHDQ
351 ARSITRFADD  SPKYRKISGK  LLTLLECSLT  GTLYVYQQQE  IGQINFKEWP
401 IEKYEDVDVK  NNYEIIKSF  GKNSKEMKDF  FKGIALLSRD  HSRTPMPWTK
451 DKPNAGFTGP  DVKPWFLLNE  SFEQGINVEQ  ESRDDDSVLN  FWKRALQARK
501 KYKELMIYGY  DFQFIDLSD  QIFSFTKEYE  DKTLFAALNF  SGEEIEFSLP
551 REGASLSFIL  GNYDDTDVSS  RVLKPWEGRI  YLVK

```

**Figure S29.** Amino acid sequence of *Saccharomyces cerevisiae*  $\alpha$ -glucosidase. The Trp(W), Phe(F), and Tyr(Y) residues are shown as yellow, cyan, and pink respectively.

Trp(W): 20, Phe(F): 41, Tyr(Y): 26



**Table S1.**  $^1\text{H}$  and  $^{13}\text{C}$  spectroscopic data of ( $\delta$  in ppm,  $J$  in Hz) **1** and **5** (acetone- $d_6$ )

| No. | <b>1</b>                   |                       | <b>5</b>                   |                       |
|-----|----------------------------|-----------------------|----------------------------|-----------------------|
|     | $\delta_{\text{H}} J$ (Hz) | $\delta_{\text{C}}$ m | $\delta_{\text{H}} J$ (Hz) | $\delta_{\text{C}}$ m |
| 2   |                            | 161.9                 |                            | 162.2                 |
| 3   |                            | 111.7                 |                            | 121.7                 |
| 4   |                            | 181.1                 |                            | 183.3                 |
| 4a  |                            | 105.6                 |                            | 105.6                 |
| 5   |                            | 162.9                 |                            | 162.8                 |
| 6   | 6.29 d (2.25)              | 98.7                  | 6.15 s                     | 99.6                  |
| 7   |                            | 166.1                 |                            | 160.4                 |
| 8   | 6.65 d (2.25)              | 93.2                  |                            | 101.5                 |
| 8a  |                            | 157.7                 |                            | 153.2                 |
| 9a  | 2.43 dd (15.98)            | 22.4                  | 3.14 d (7)                 | 24.7                  |
| 9b  | 3.39 d (15.95)             |                       |                            |                       |
| 10  | 3.99 d (6.3)               | 38.0                  | 5.09 m                     | 122.6                 |
| 11  |                            | 145.4                 |                            | 132.2                 |
| 12  | 1.78 s                     | 22.0                  | 1.57 s                     | 25.9                  |
| 13a | 4.29 s                     | 111.9                 | 1.46 s                     | 17.7                  |
| 13b | 4.65 s                     |                       |                            |                       |
| 14  |                            |                       | 5.61 d (10.1)              | 116.0                 |
| 14a |                            |                       | 5.61 d (10.1)              | 126.9                 |
| 15  |                            |                       |                            | 81.4                  |
| 16  |                            |                       | 1.42 s                     | 27.2                  |
| 17  |                            |                       | 1.69 m                     | 42.1                  |
| 18  |                            |                       | 2.07 m                     | 23.4                  |
| 19  |                            |                       | 5.09 m                     | 124.8                 |
| 20  |                            |                       |                            | 132.4                 |
| 21  |                            |                       | 1.63 s                     | 25.8                  |
| 22  |                            |                       | 1.54 s                     | 17.7                  |
| 1'  |                            | 106.6                 |                            | 111.5                 |
| 2'  |                            | 151.4                 |                            | 149.7                 |
| 3'  | 6.50 s                     | 103.8                 | 6.59 s                     | 104.8                 |
| 4'  |                            | 151.2                 |                            | 149.8                 |
| 5'  |                            | 136.9                 |                            | 139.1                 |
| 6'  |                            | 129.4                 | 6.88 s                     | 117.2                 |
| OMe | 3.89 s                     | 56.4                  |                            |                       |

**Table S2.** Determination of  $K_{ik}/K_{iv}$  ratios by  $\alpha$ -glucosidase enzyme inhibitory behaviours.

| Compounds | [I] ( $\mu$ M) | $V_{max}$ | $K_m$     | $K_{ik}/K_{iv}$ |
|-----------|----------------|-----------|-----------|-----------------|
| <b>2</b>  | 0              | 9.337     | 186.0878  | -               |
|           | 7.5            | 9.7056    | 740.5780  | 76.6587         |
|           | 15             | 9.6712    | 868.3559  | 102.4604        |
|           | 30             | 9.8012    | 2117.5032 | 209.3396        |
| <b>3</b>  | 0              | 6.5274    | 193.6945  | -               |
|           | 17.5           | 6.6800    | 301.7435  | 23.8593         |
|           | 35             | 6.7889    | 439.0428  | 31.6240         |
|           | 70             | 6.7204    | 627.7285  | 75.7804         |
| <b>4</b>  | 0              | 6.8027    | 202.3061  | -               |
|           | 7.5            | 6.3816    | 397.2304  | 16.6987         |
|           | 15             | 7.3692    | 812.0855  | 11.4837         |
|           | 30             | 7.4627    | 1318.5821 | 20.2662         |
| <b>6</b>  | 0              | 6.8013    | 194.8085  | -               |
|           | 7.5            | 5.0352    | 265.5740  | 3.7049          |
|           | 15             | 4.2992    | 319.4798  | 2.5098          |
|           | 30             | 3.6219    | 365.4835  | 1.8101          |
